# Supplementary material for: Unveiling Strong Thin Film Confinement Effects on Semirigid Conjugated Polymers
Source: PubMed Central journal article supplement (PMC11468787; doi:10.1021/acs.macromol.4c01500), 2024-09-23
Supplement: ma4c01500_si_001.pdf [file ma4c01500_si_001.pdf]

## Supporting Information

### Unveiling Strong Thin Film Confinement Effects on Semi-rigid Conjugated Polymers

Haoyu Zhao<sup>a</sup>, Zhaofan Li<sup>b</sup>, Yunfei Wang<sup>a</sup>, Qi-An Hong<sup>c</sup>, Wenjie Xia<sup>b\*</sup>, Yu-Cheng Chiu<sup>c\*</sup>, and Xiaodan Gu<sup>a\*</sup>

<sup>a</sup>School of Polymer Science and Engineering, The University of Southern Mississippi, 118 College Drive, Hattiesburg, MS 39406, United States of America

<sup>b</sup>Department of Aerospace Engineering, Iowa State University, 2433 Union Dr, Ames, IA 50011, United States of America

<sup>c</sup>Department of Chemical Engineering, National Taiwan University of Science and Technology, Taipei City, 10607, Taiwan

\*E-mail: [wxia@iastate.edu](mailto:wxia@iastate.edu), [ycchiu@mail.ntust.edu.tw](mailto:ycchiu@mail.ntust.edu.tw), [xiaodan.gu@usm.edu](mailto:xiaodan.gu@usm.edu)

This file includes:

Figure S1 to S15

Table S1

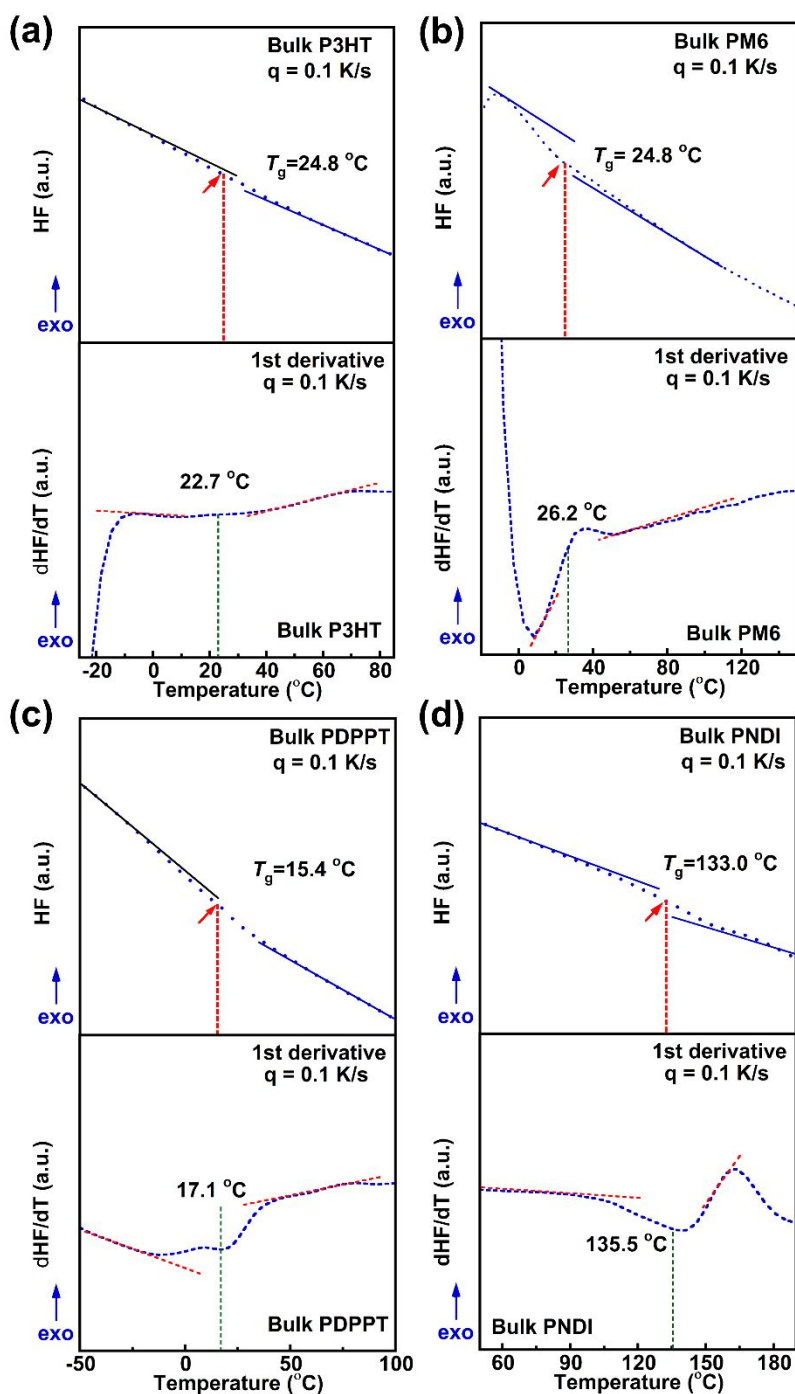

**Figure S1.** Flash DSC heat flow vs. temperature for bulk CPs  $T_g$  measurements **a).** top: bulk  $T_g$  of P3HT at cooling rates of 0.1 K/s; bottom: corresponding 1<sup>st</sup> derivative plots for verification **b).** top: bulk  $T_g$  of PDPPT at cooling rates of 0.1 K/s; bottom: corresponding 1<sup>st</sup> derivative plots for verification **c).** top: bulk  $T_g$  of PM6 at cooling rates of 0.1 K/s; bottom: corresponding 1<sup>st</sup> derivative plots for verification **d).** top: bulk  $T_g$  of PNDI at cooling rates of 0.1 K/s; bottom: corresponding 1<sup>st</sup> derivative plots for verification where dashed lines represent glassy and liquid lines and the arrow indicates the occurrence of glass transition temperatures.

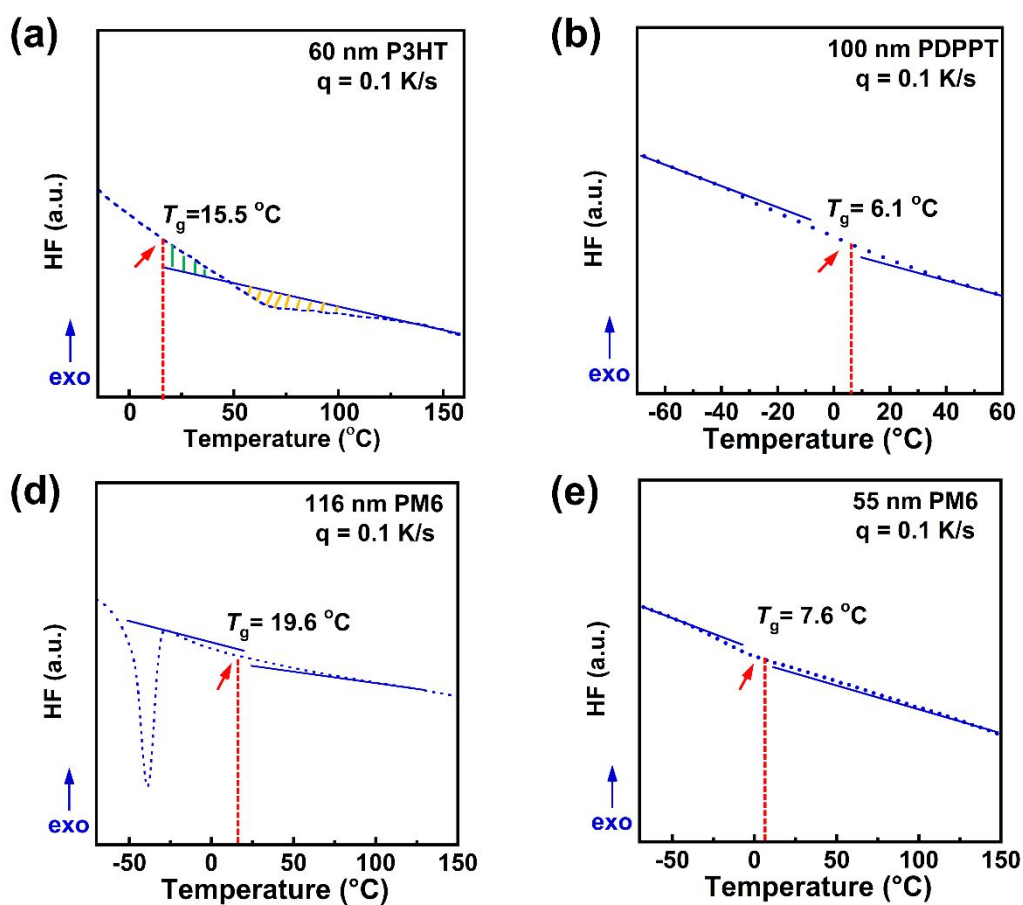

**Figure S2.** Flash DSC heat flow vs. temperature for CPs  $T_g$  measurements at specific film thickness **a)** 60 nm P3HT\* **b)** 100 nm PDPPT **c)** 116 nm PM6 **d)** 55 nm PM6, where dashed lines represent glassy and liquid lines and the arrow indicates the occurrence of glass transition temperatures.

\*For enthalpy overshoot appeared figures, the  $T_g$  is calculated based on the graphical method by equating the two areas as shown in figures of orange and green parts, reported by Moniyhan's method

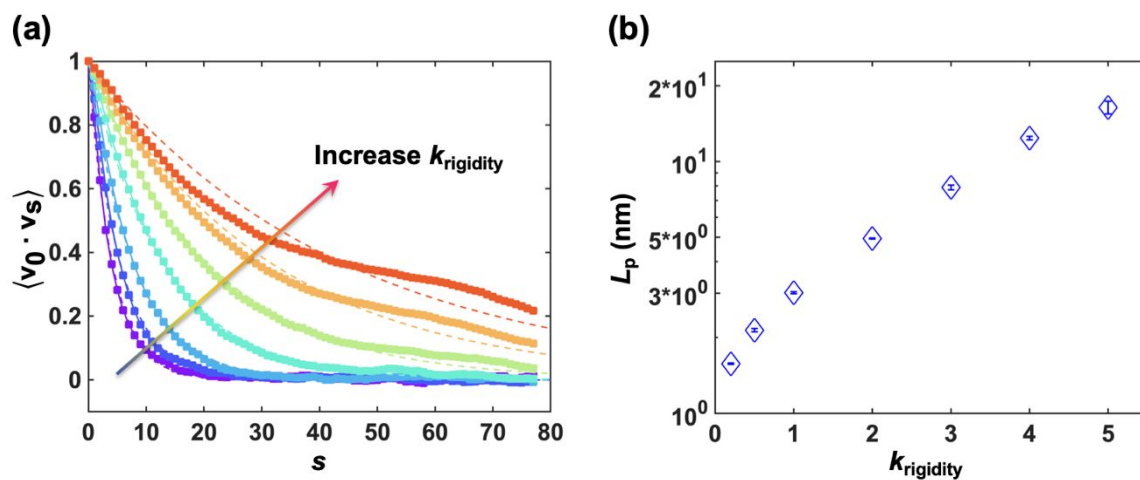

**Figure S3.** Persistence length  $L_p$  calculation in MD simulations. We performed the  $L_p$  calculation by considering the beads along the backbone chain contour.  $\mathbf{v}_s$  was denoted as the tangent vector connecting two segments  $s$  and  $s+1$ , and the  $L_p$  was determined from the tangent-tangent correlation function  $\langle \mathbf{v}_0 \cdot \mathbf{v}_s \rangle$  with the average taken over all trajectories,  $\langle \mathbf{v}_0 \cdot \mathbf{v}_s \rangle = e^{-s/n_p}$ , where  $n_p$  is the persistence length measured in the number of monomers.  $L_p$  is taken as  $l_0 \cdot n_p$ , in which  $l_0$  is average monomer repeat unit length. **a).** Tangent-tangent correlation function with increasing the  $K_{\text{rigidity}}$ . **b).**  $L_p$  as a function of  $K_{\text{rigidity}}$ .

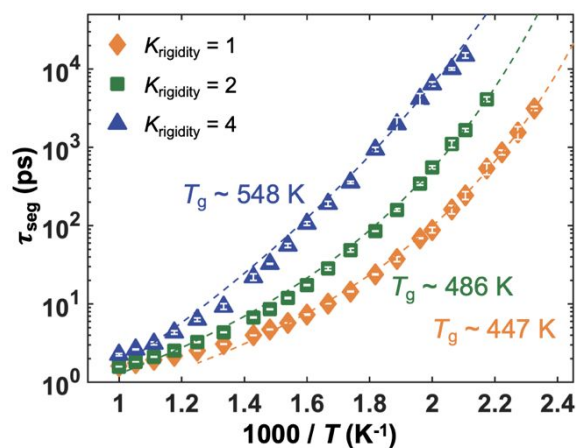

**Figure S4.**  $T$ -dependent segmental relaxation time  $\tau_{\text{seg}}$  for bulk states with different  $K_{\text{rigidity}}$  values. The dashed curves represent the fits of  $\tau_{\text{seg}}$  data using the VFT equation, allowing for the estimation of the glass transition temperature  $T_g$ .

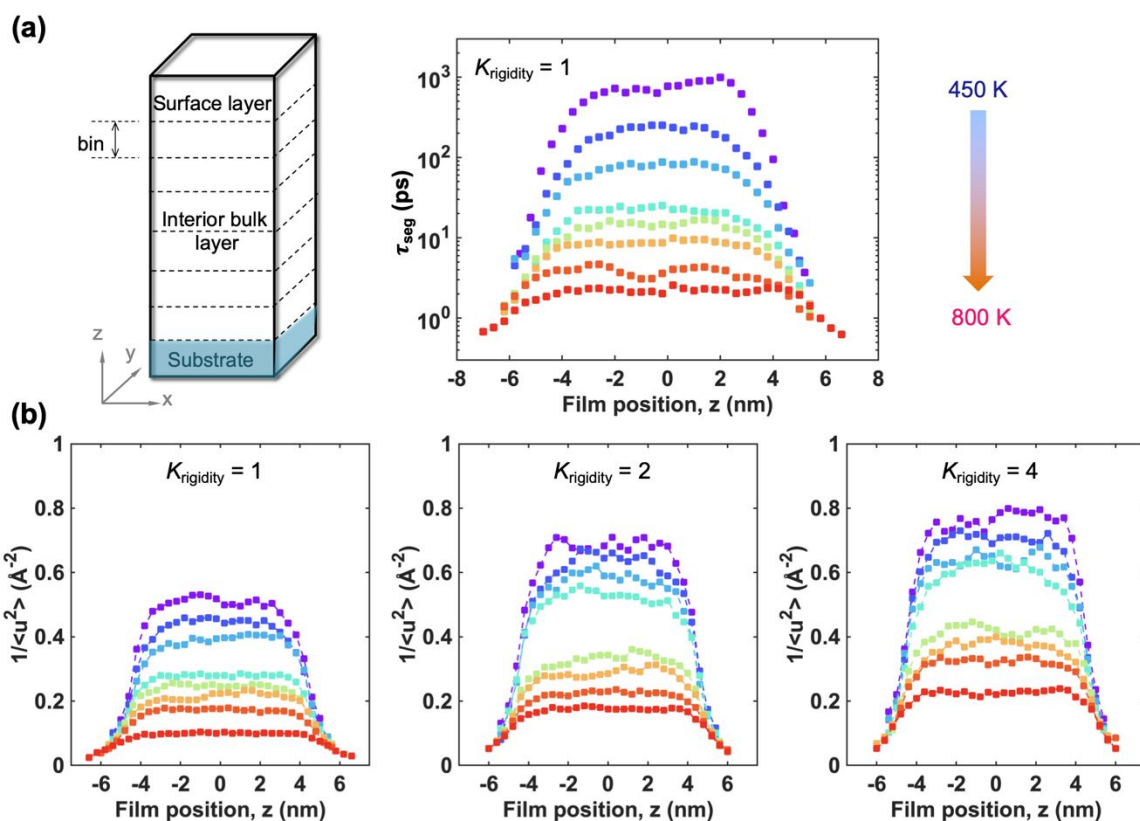

**Figure S5. a).** The spatial distribution of local  $\tau_{seg}$  as a function of film position  $z$  with  $K_{rigidity}$  of 1 for different temperatures. **b).** The distribution of local molecular stiffness  $1/\langle u^2 \rangle$  as a function of film position  $z$  for different  $K_{rigidity}$  under varying temperatures.

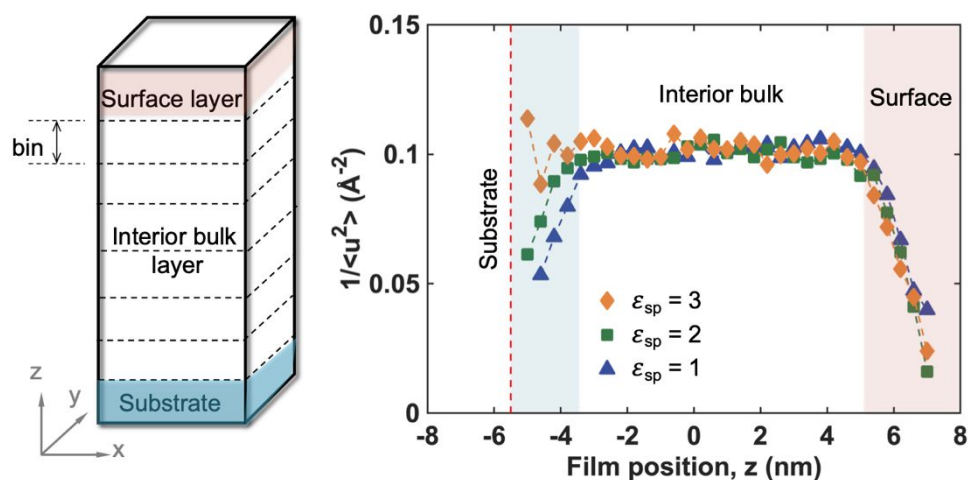

**Figure S6.** Schematic of supported polymer thin film consisting of substrate, interior bulk-like layer, and softer surface layer. Spatial distribution of the local stiffness,  $1/\langle u^2 \rangle$ , as a function of film position  $z$  from the substrate–film interface to the free surface.  $\epsilon_{sp}$  indicates the energy strength of attraction to the substrate, which is varied from 1 to 3 kcal/mol in simulations. In the special case where  $\epsilon_{sp} = 0$  kcal/mol, the system becomes a free-standing thin film with no substrate interaction.

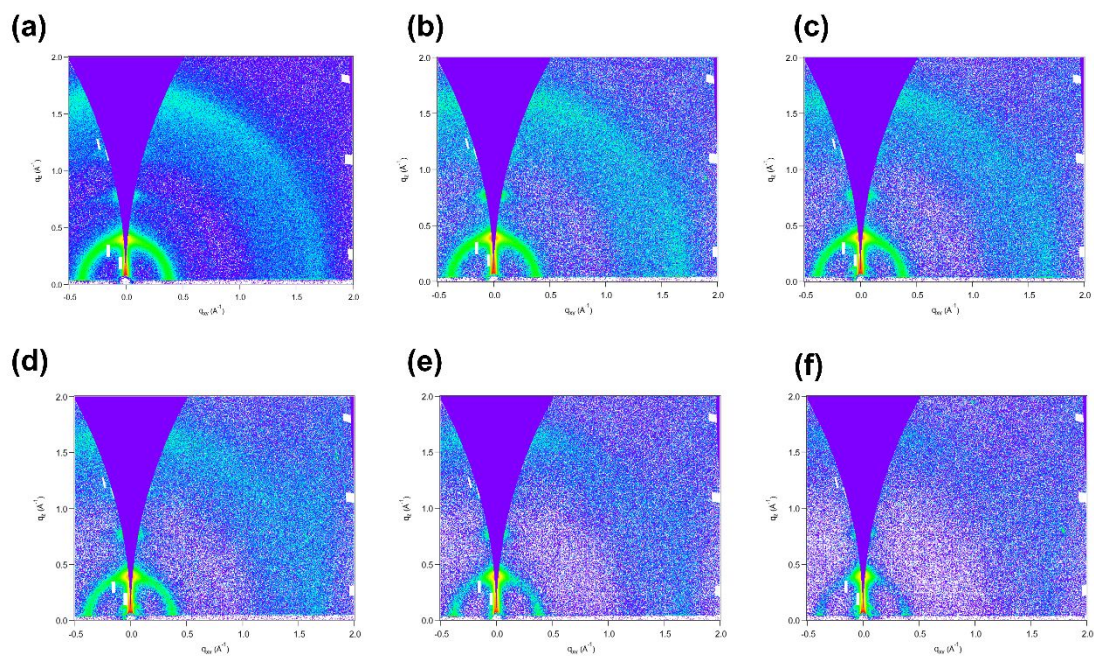

**Figure S7.** Representative GIWAXS 2D images for P3HT at various film thickness **a)** 80 nm **b)** 51 nm **c)** 38 nm **d)** 30 nm **e)** 20 nm **f)** 13 nm

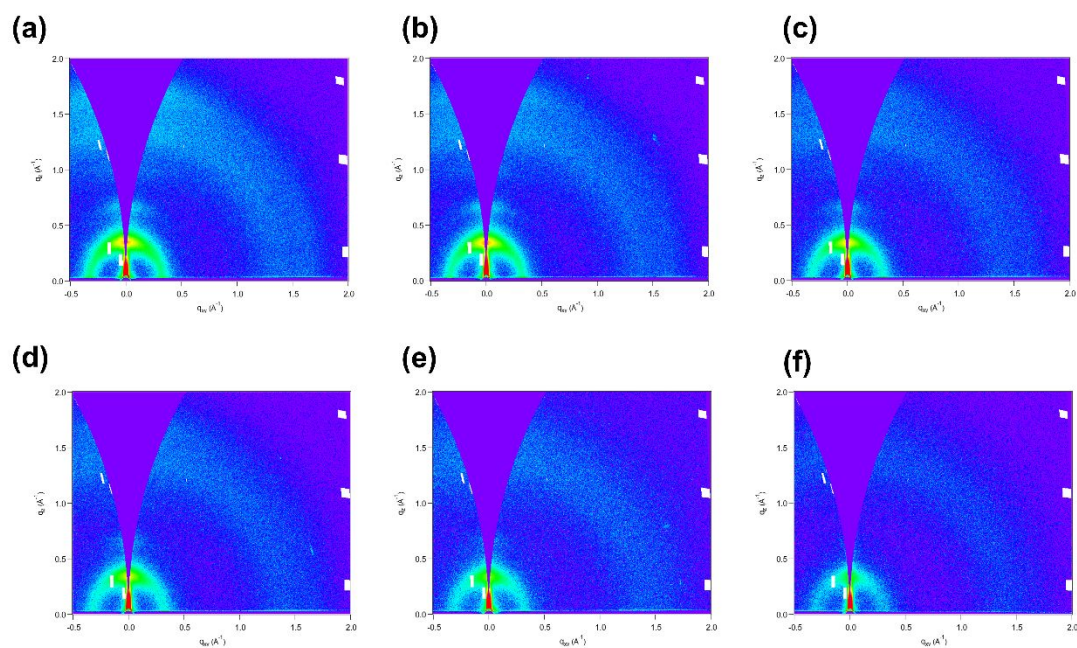

**Figure S8.** Representative GIWAXS 2D images for PDPPT at various film thickness **a)** 121 nm **b)** 88 nm **c)** 68 nm **d)** 40 nm **e)** 33 nm **f)** 23 nm

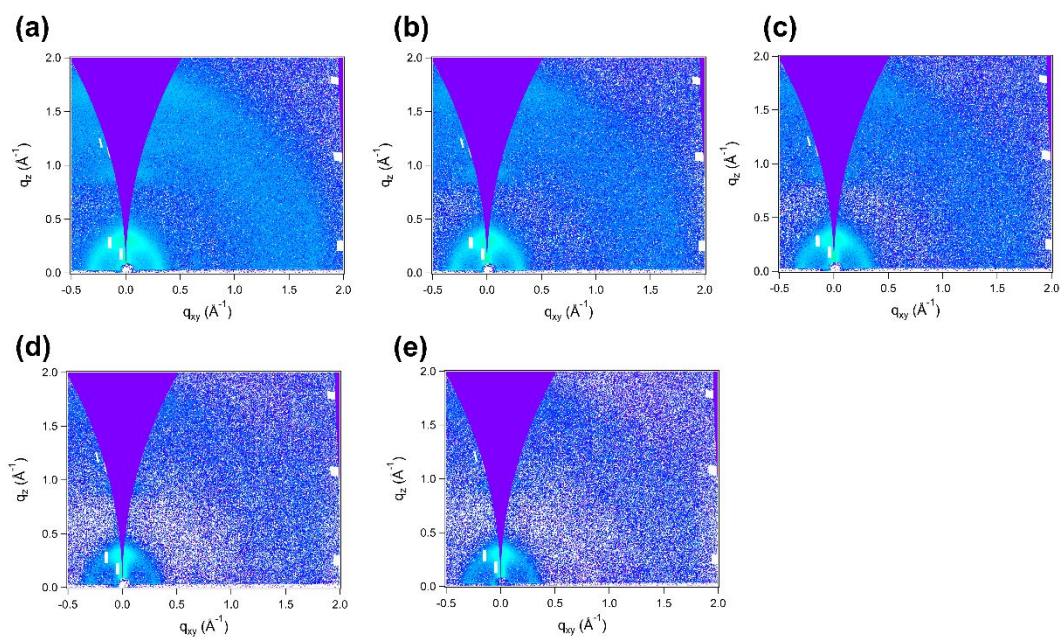

**Figure S9.** Representative GIWAXS 2D images for PM6 at various film thickness **a)** 126 nm **b)** 69 nm **c)** 50 nm **d)** 23 nm **e)** 13 nm

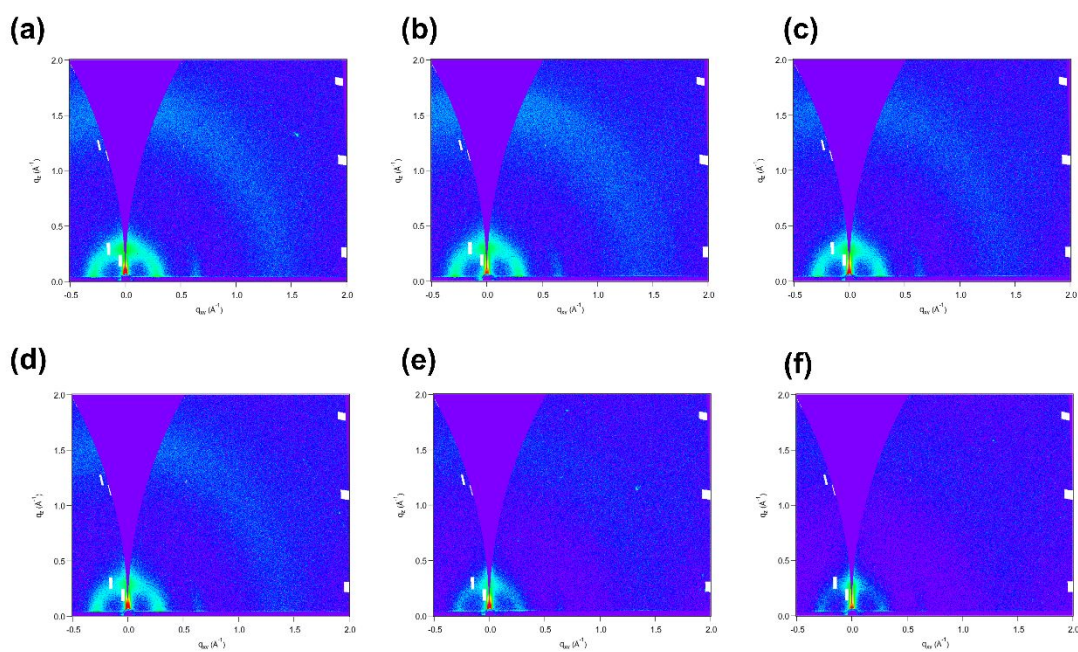

**Figure S10.** Representative GIWAXS 2D images for PNDI at various film thickness **a)** 63 nm **b)** 55 nm **c)** 44 nm **d)** 37 nm **e)** 16 nm **f)** 12 nm

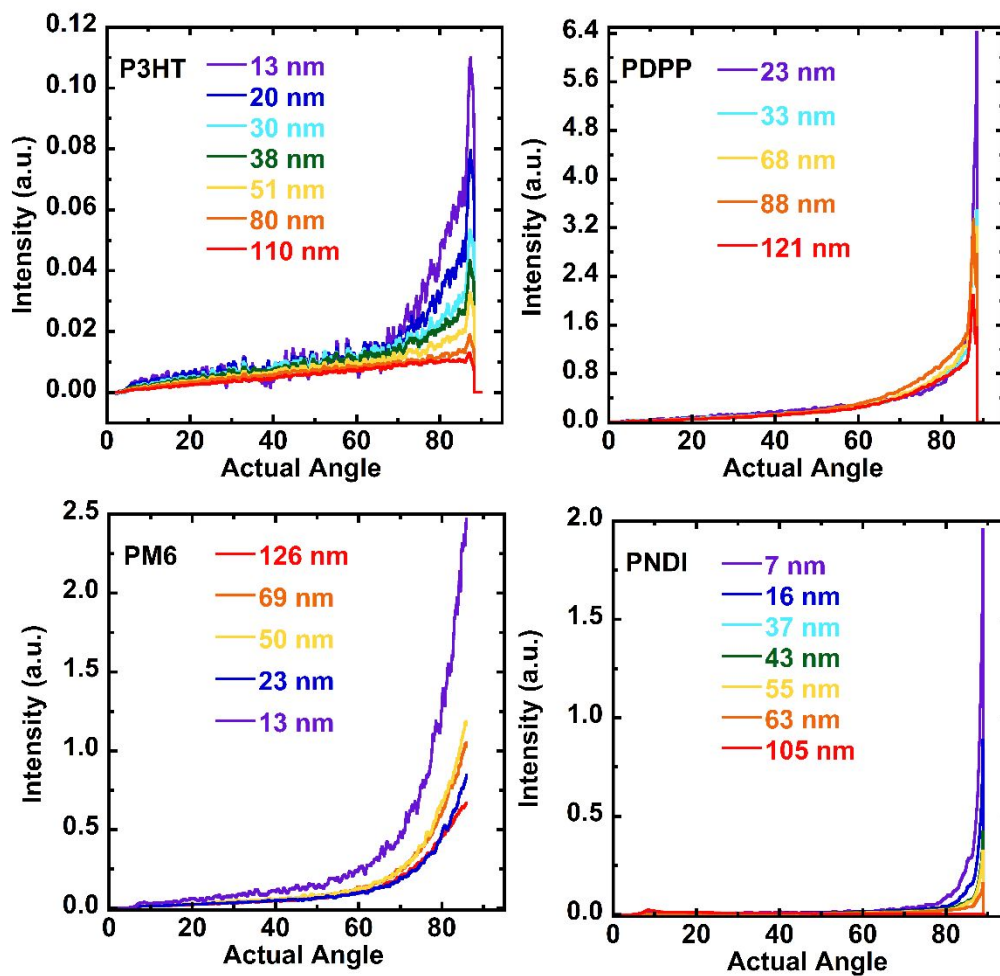

**Figure S11.** Pole figures for rDOC calculations for P3HT, PDPP, PM6 and PNDI



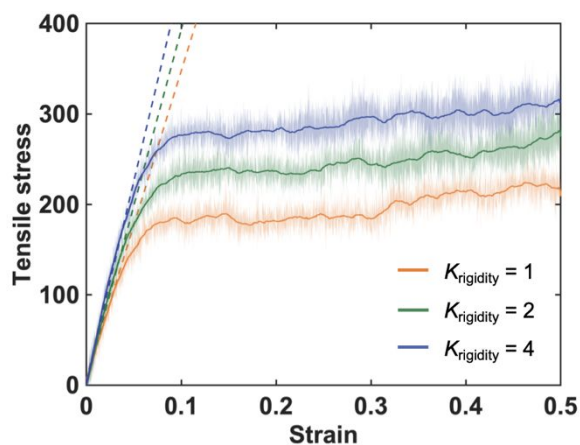

**Figure S12.** Stress-strain response for bulk polymers with different chain rigidity  $K_{\text{rigidity}}$  under uniaxial tension. The elastic modulus is determined by linearly fitting the stress-strain data within 4% strain as marked by the dashed lines.

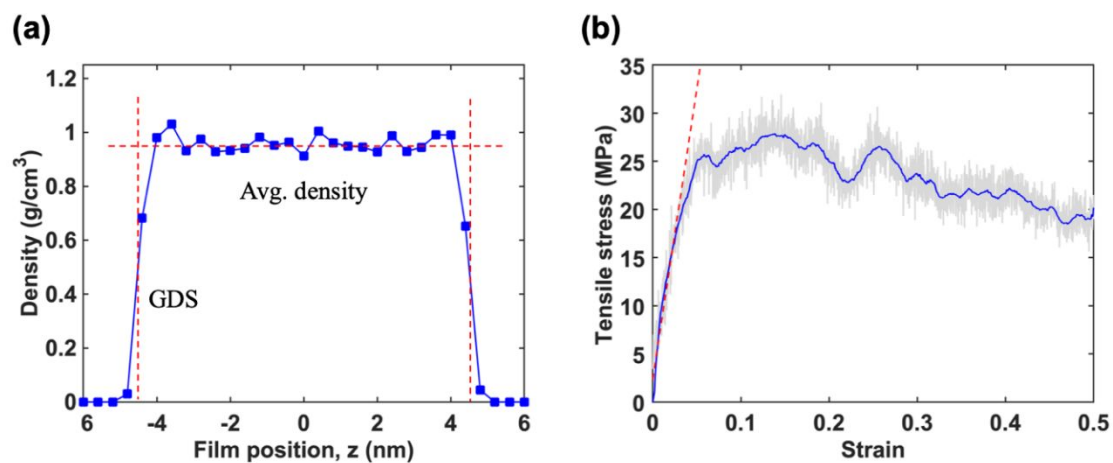

**Figure S13. a).** Representative density profile along the height of thin film  $z$  with a thickness of  $\sim 10$  nm for  $K_{\text{rigidity}} = 1$ . **b).** Representative stress-strain response for thin film system with a thickness of  $\sim 10$  nm for  $K_{\text{rigidity}} = 1$ . Dashed line refers to the linear fit of elastic deformation stage for determining the elastic modulus.

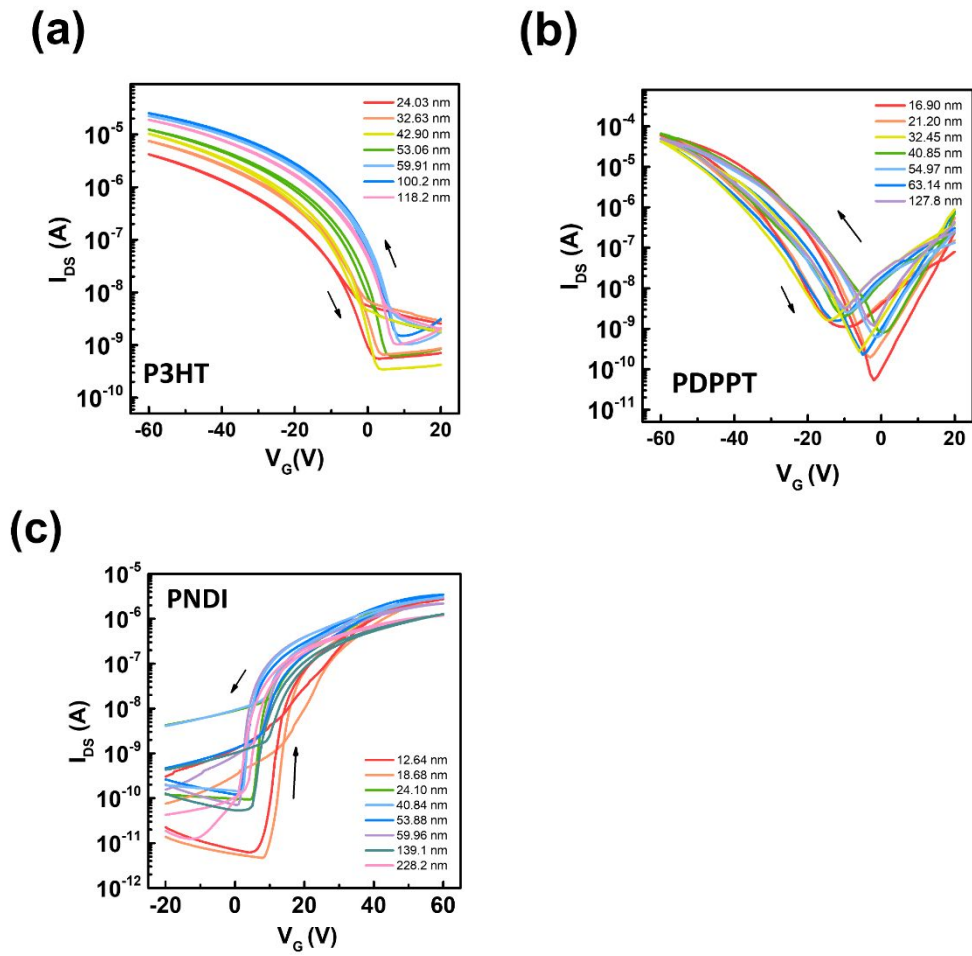

**Figure S14.** The hysteresis curve of different conditions for a) P3HT b) PDPPT c) PNDI at  $V_{DS} = -60$  V

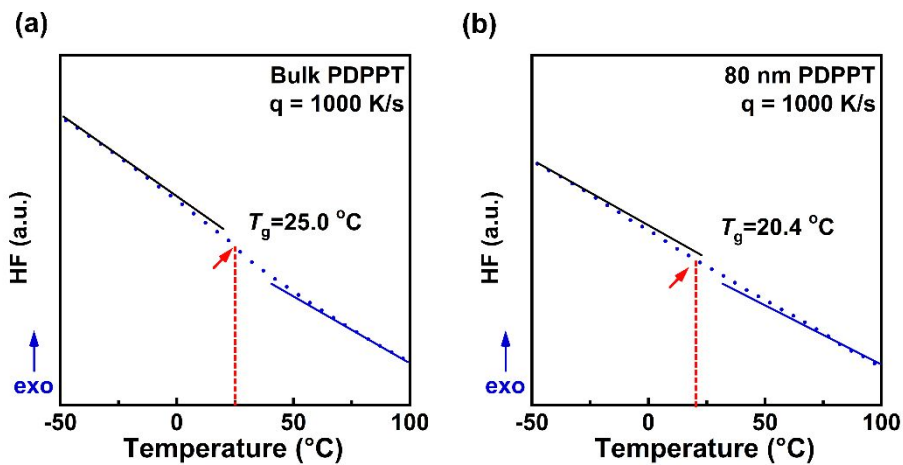

**Figure S15.**  $T_g$  measurements for bulk and 80 nm PDPPT samples at cooling rate of 1000 K/s

**Table S1.**  $T_g$  Values for CG Polymer Models with Different Chain Rigidity ( $K_{\text{rigidity}}$ ).

|                                        | $K_{\text{rigidity}} = 1$ | $K_{\text{rigidity}} = 2$ | $K_{\text{rigidity}} = 4$ |
|----------------------------------------|---------------------------|---------------------------|---------------------------|
| $T_g^{\text{film} \sim 10 \text{ nm}}$ | 434.5 K                   | 472.4 K                   | 530.5 K                   |
| $T_g^{\text{film} \sim 30 \text{ nm}}$ | 437.3 K                   | 473.4 K                   | 533.3 K                   |
| $T_g^{\text{bulk}}$                    | 447.1 K                   | 485.8 K                   | 548.4 K                   |
| $\Delta T_g$                           | $\sim 12.6$ K             | $\sim 13.4$ K             | $\sim 17.9$ K             |
